# Supplementary material for: Estimation of the natural background of phosphate in a lowland river using tidal marsh sediment cores
Source: Copernicus journal article supplement (doi:10.5194/bg-19-763-2022), 2022-02-09
Supplement: Supplementary file 1 [file bg-19-763-2022-supplement.zip]

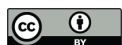

*Supplement of*

**Estimation of the natural background of phosphate in a lowland river using tidal marsh sediment cores**

**Florian Lauryssen et al.**

*Correspondence to:* Florian Lauryssen ([florian.lauryssen@kuleuven.be](mailto:florian.lauryssen@kuleuven.be))

- [bg-19-763-2022-supplement-title-page.pdf](#)
- Supplementary Info
  - [20211024SITidalMarsh\\_finalrevisions.docx](#)
  - [TidalmarshSedimentProfiles.csv](#)

The copyright of individual parts of the supplement might differ from the article licence.
